# Supplementary material for: Genome-Wide Identification and Expression Analysis of Senescence-Associated Genes in Grapevine (Vitis vinifera L.) Reveal Their Potential Functions in Leaf Senescence Order
Source: Int J Mol Sci. 2022 Oct 22;23(21):12731. doi: 10.3390/ijms232112731 (PMC9656468; doi:10.3390/ijms232112731)
Supplement: Supplementary file 1 [file ijms-23-12731-s001.zip › Supplementary Table S1.pdf]

Table S1. List of primers used for RT-qPCR.

| Classification               | Gene Name      | Gene ID              | Primer sequence(5'→3')                                   |
|------------------------------|----------------|----------------------|----------------------------------------------------------|
| Reference gene               | <i>VvActin</i> | VIT_04s0044g00580.1  | F:CTTGCATCCCTCAGCACCTT                                   |
|                              |                |                      | R:TCCTGTGGACAATGGATGGA                                   |
| Chl degradation related SAGs | <i>VvNYC1</i>  | VIT_211s0016g03890.2 | F:GGTGAATTGGAGGAGCAAGAGAAG<br>R:GGAAACCCTAACAAACACGGACTT |
|                              | <i>VvNOL1</i>  | VIT_201s0010g00590.1 | F:GGCGATTACTGCTTCCGTGTC<br>R:AAGGTGAGGAAGGCGTGAGAG       |
|                              | <i>VvNOL2</i>  | VIT_212s0035g01780.1 | F:GCTCTCATCAGTCGCCTCTTCT<br>R:CGTGCCAACTCTTCAACTACT      |
|                              | <i>VvSGRL</i>  | VIT_218s0001g01210.1 | F:ACCCTCTCCCACTGTGACTTTAC<br>R:ACTTCCTTCCACTCAGCAACCA    |
|                              | <i>VvSGR</i>   | VIT_202s0025g04660.1 | F:ACGCTTACGCATAGTGACATAACA<br>R:ATTCTGCCACCACCTCATCTCTT  |
|                              | <i>VvRCCR</i>  | VIT_207s0031g00680.1 | F:CCTACATCTCTGGTCCTCATTCT<br>R:AGTTGTCTGCGACTCTCCAAT     |
|                              | <i>VvHCAR</i>  | VIT_205s0051g00070.2 | F:AGTGGACAGGGATAGTGACAACAA<br>R:TCATCTGGCGTCCTGGCTAAG    |
|                              | <i>VvPAO1</i>  | VIT_204s0008g07020.1 | F:GCGGAGTATGATTGGAAGGAAGAG<br>R:CCTTGCCATCACGATACAACACA  |
|                              | <i>VvPAO2</i>  | VIT_206s0004g00610.1 | F:AGAGTCACAGCCAGGAAGAGAAG<br>R:CACCACACCACCACATCAAGAC    |
|                              | <i>VvPAO3</i>  | VIT_206s0004g00620.1 | F:CAAGAGAAAGCCGCATTCCAAGA<br>R:GAGCCAACCTATGAGCACAAGC    |
|                              | <i>VvPAO4</i>  | VIT_206s0061g00790.1 | F:TGAAGTTGTTGCGGTTGATGATGA<br>R:GCGATTAGTGTCCAGGTCCTCA   |
|                              | <i>VvPPH1</i>  | VIT_204s0023g02010.1 | F:GCTCTTCTTCAATCACAACCGACT<br>R:ACCCGCAGCAACGATTCTT      |
|                              | <i>VvPPH2</i>  | VIT_213s0158g00180.2 | F:ATCCTGCTCCTCAATCCAAGAA<br>R:GGTCCTGCCATAAGTCAATAGAG    |
|                              | <i>VvPPH3</i>  | VIT_216s0022g01340.1 | F:AGAGAGGAGCCCAGAGGTTGT<br>R:GGTGAGGTTATAGGCAGTTGAAGC    |

|               |                  |                      |                                                        |
|---------------|------------------|----------------------|--------------------------------------------------------|
|               | <i>VvFtsH6-1</i> | VIT_212s0028g01600.1 | F:GGTGAGCCTGAGGTGACAACA<br>R:TGAGCCGAGGTGTCCATAAGC     |
|               | <i>VvFtsH6-2</i> | VIT_214s0108g00590.1 | F:CCAGAGAGCCCAAGTTGAATCCA<br>R:ATCTCGGCAATCGCAACAGTTC  |
| ABFs          | <i>VvZIP08</i>   | VIT_203s0063g00310.1 | F:GGGCTACAGAGTGGAGGAATGG<br>R:GAGCAGGCGATAATGAAGATGTGT |
|               | <i>VvZIP25</i>   | VIT_208s0007g03420.1 | F:ACCGTAAGTCCAGTGTCTTCCG<br>R:TGTCTCCGTTCCACCACCTTC    |
|               | <i>VvZIP45</i>   | VIT_218s0001g10450.1 | F:GCAGAAAAATCAGGTTATGGAG<br>R:AGCACAGCAAACAATTCCCT     |
| ABA receptors | <i>VvRCAR1</i>   | VIT_215s0046g01050.1 | F:TGATGGGAGACCAGGGACAC<br>R:TTTGAGGTTGCAGTTGATGAG      |
|               | <i>VvRCAR2</i>   | VIT_216s0050g02620.2 | F:GGATGTGAAAGTGGGAATGG<br>R:GGAAGATGGAAGAAGGGCTAC      |
|               | <i>VvRCAR3</i>   | VIT_202s0025g01340.2 | F:GGCAAAGCATTTGAGGAAC<br>R:GGGTAGCATTGAAAGGAAGAG       |
|               | <i>VvRCAR4</i>   | GSVIVT00035869001    | F:CTGTAATTGGAGGGGACCAC<br>R:CACCACGTACGACTCCATCA       |
|               | <i>VvRCAR5</i>   | GSVIVT00037390001    | F:GTTTTTGTGCGACACCATCGTT<br>R:TCATGACGATGACCTCTTGC     |
|               | <i>VvRCAR6</i>   | VIT_213s0067g01940.1 | F:CGGGTAACACGAAGGAGGA<br>R:GGGGTGCAATAATCTAAAAGAG      |
|               | <i>VvRCAR7</i>   | VIT_202s0012g01270.1 | F:ACTACCGGTCGGTGACTIONG<br>R:TCCTCTGTGTTCCCTTCTGG      |
| PP2C          | <i>VvPP2C4</i>   | VIT_211s0016g03180.1 | F:TGGGCTTTGGGATGTTATGT<br>R:TGTGCAGGAGTCTCATCAGC       |
|               | <i>VvPP2C9</i>   | VIT_206s0004g05460.2 | F:TTAAAGCCCTTCGTGAGCTG<br>R:GACACCACGTCCCACAGAC        |
| SnRK          | <i>VvSnRK2.1</i> | VIT_202s0236g00130.1 | F:TTTTTGTGGCAAACCCAGAT<br>R:CAGCTTCCTCCATCCATCAT       |
|               | <i>VvSnRK2.3</i> | VIT_212s0035g00310.1 | F:AGCTCTTTGAGCGAATCTGC<br>R:CATGGAATGGCAATAGCTGA       |
